# Supplementary material
Source: PubMed Central journal article supplement (PMC7540102)
Supplement: ajtr0012-5619-f7.pdf [file ajtr0012-5619-f7.pdf]

## FOXA2 in prostate cancer bone metastasis

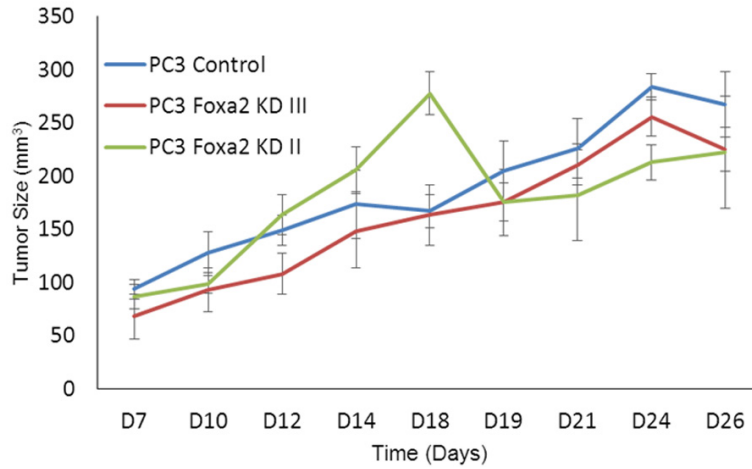

**Supplementary Figure 1.** PC3/Control and PC3/FOXA2-KD cells were inoculated subcutaneously in mice. The tumor size was measured one-week post-injection, 3 times/week. No statistically significant changes were observed in the tumor growth among the experimental groups. Error bars reported as standard deviation.
